# Supplementary material
Source: PubMed Central journal article supplement (PMC3508151)
Supplement: NIHMS409300-supplement-1.pdf [file NIHMS409300-supplement-1.pdf]

## **SUPPLEMENTARY INFORMATION:**

### **Redirecting cell-type specific cytokine responses with engineered interleukin-4 superkines**

Ilkka S. Junttila, Remi J. Creusot, Ignacio Moraga, Darren L. Bates, Michael T. Wong, Michael N. Alonso, Megan M. Suhoski, Patrick Lupardus, Martin Meier-Schellersheim, Edgar G. Engleman, Paul J. Utz, C. Garrison Fathman, William E. Paul, K. Christopher Garcia

## **SUPPLEMENTARY METHODS:**

### *Yeast Display of IL-4*

General yeast display methodologies are modified from previously described protocols<sup>1-3</sup>. Human IL-4 DNA was cloned into yeast display vector pCT302. *S. cerevisiae* strain EBY100 was transformed with the pCT302\_IL-4 vector and grown for 3 days at 30 °C on SDCAA plates. Individual colonies of IL-4 yeast were grown overnight at 30 °C in SDCAA liquid media (pH 4.5), followed by induction in SGCAA liquid media (pH 7.0) for 2 days at 20 °C. The yeast were stained with biotinylated IL-4R $\alpha$  (b-IL-4R $\alpha$ ), tetramerized biotinylated  $\gamma$ c (b- $\gamma$ c), or b- $\gamma$ c in the presence of b-IL-4R $\alpha$ . Highest concentration  $\gamma$ c tetramers were formed by incubating 2  $\mu$ M b- $\gamma$ c with 470 nM SAV-PE (streptavidin-phycoerythrin conjugate, Invitrogen) for 15 min on ice. Analysis was performed on an Accuri C6 flow cytometer.

### *Assembly PCR of IL-4 Site Directed Library Construction and Selection*

Assembly PCR was done using 11 overlapping primers one of which contained the randomized codon sequence NNK (aa 117, 118, 121, 122, 124, 125, 128, 129). The PCR product was further amplified using the primers:

5'CTAGTGGTGGTGGTGGTTCTGGTGGTGGTGGTTCTGGTGGTGGTGGTTCTGC  
TAGCCACAAGTGCGATATCACCTTAC 3'

5'CAGATCTCGAGCAAGTCTTCTTCGGAGATAAGCTTTTGTTCGCCACCAGAG  
GATCC 3'

These primers also contained the necessary vector sequence homology for homologous recombination. Insert DNA was combined with linearized vector backbone pCT302 and electrocompetent *S. cerevisiae* EBY100, electroporated, and rescued, as previously described.<sup>27</sup> The electroporations yielded a library of  $2 \times 10^8$  transformants. Selections were performed using magnetic activated cell sorting (MACS, Miltenyi). The first round of selection was performed with  $2 \times 10^9$  cells from the yeast library, approximately 10-fold coverage of the number of transformants. Subsequent rounds of selection used  $1 \times 10^7$  yeast cells. IL-4 libraries were grown fresh overnight at 30°C in SDCAA liquid media (pH 4.5), followed by induction in SGCAA liquid media (pH 7.0) for 2 days at 20 °C. The yeast were stained with biotinylated IL-4R $\alpha$  (b-IL-4R $\alpha$ ), tetramerized biotinylated  $\gamma$ c (b- $\gamma$ c), or b- $\gamma$ c in the presence of b-IL-4R $\gamma$  with a buffer solution of 1xPBS and 0.5% BSA for 2 hrs at 4 C. Tetramers of  $\gamma$ c were formed by incubating 2  $\mu$ M b- $\gamma$ c with 470 nM SAV-PE (streptavidin-phycoerythrin conjugate, Invitrogen) for 15 min on ice. Monomeric selection with  $\gamma$ c was done through sequential binding of  $\gamma$ c, 2 $\mu$ g/mL SA-PE, and

50 $\mu$ l Miltenyi anti-PE microbeads/ $1 \times 10^8$  yeast cells. Analysis was performed on an Accuri C6 flow cytometer.

### *Protein Expression and Purification*

Human IL-4 variants (amino acids 1-129), the IL-4R $\alpha$  ectodomain (amino acids 1-202), IL-13R $\alpha$ 1 (amino acids 1-310), and  $\gamma$ c (amino acids 34-232) were cloned into the pAcGP67A vector (BD Biosciences) in frame with an *N*-terminal gp67 signal sequence and *C*-terminal hexahistidine tag and produced using the baculovirus expression system as described in <sup>4</sup>. Baculovirus stocks were prepared by transfection and amplification in *Spodoptera frugiperda* (Sf9) cells grown in SF900II media (Invitrogen), and protein expression was carried out in suspension *Trichoplusia ni* (HiFive) cells grown in InsectXpress media (Lonza). Proteins were expressed and captured from HiFive supernatants after 48-60 h by nickel agarose (Qiagen), concentrated and purified by size exclusion chromatography on a Superdex 200 column (GE Healthcare), equilibrated in 10 mM HEPES (pH 7.2) and 150 mM NaCl. The recombinant cytokines were purified to greater than 98% homogeneity. IL-4 variants used in cell based assays were expressed fully glycosylated as seen by comassie gel. The high affinity binary complexes (IL-4R $\alpha$  with IL-4 variants) used in SPR measurements were coexpressed and fully glycosylated. For biotinylated receptor expression, IL-4R $\alpha$ , IL-13R $\alpha$ 1, and  $\gamma$ c were cloned into the pAcGP67-A vector with a *C*-terminal *biotin* acceptor peptide (*BAP*)-LNDIFEAQKIEWHE and hexahistidine tag. Receptor proteins were coexpressed with BirA ligase with excess biotin (100  $\mu$ M). For crystallization, IL-4 RGA was co-expressed with  $\gamma$ c with the N-linked glycosylation site Asn53 mutated to Gln. After nickel purification, the crystallization proteins were treated overnight with carboxypeptidase-A at a

ratio of 1:100, followed by size exclusion. Protein was concentrated to 8–20 mg/mL for crystallization.

### *Surface Plasmon Resonance*

SPR experiments were conducted on a Biacore T100 instrument. Protein concentrations were quantified by UV spectroscopy at 280 nm using a Nanodrop2000 spectrometer (Thermo Scientific). All data was analyzed using the Biacore T100 evaluation software version 2.0 with a 1:1 Langmuir binding model. Experiments used a Biacore SA sensor chip (GE Healthcare). Biotinylated receptors were captured at a low density (100–200 RU) and kinetic runs were conducted at 40  $\mu$ L/min. An unrelated biotinylated protein was immobilized as a reference surface for the SA sensor chip with matching RU to the experimental surface. All measurements were made using 3-fold serial dilution of IL-4 variants in the running buffer (1xHBS-P (GE Healthcare), 0.01% BSA). The  $\gamma$ c surface was regenerated for cytokines IL-4 RQ and IL-4 RGA with 7 mM glycine (pH 3.0) and 250 mM NaCl. Kinetic data was determined using 120 s to 190 s of IL-4 variant association and 20 s to 900 s disassociation.

### *Crystallization and Data Collection*

IL-4 RGA/  $\gamma$ c crystals were grown in sitting drops at 25 °C by mixing 0.1  $\mu$ L protein [20 mg/mL in 10 mM HEPES-NaOH (pH 7.2) and 150 mM NaCl] with an equal volume of 50 mM HEPES (pH 7.2), 200 mM NaCl, and 30% PEG-4000. Crystals grew to a maximum size of 200  $\times$  40  $\times$  40  $\mu$ m in 5–10 days. Crystals were flash frozen in liquid nitrogen using mother liquor containing 25% Ethylene Glycol as a cryoprotectant. A 3.3 $\text{\AA}$  data set was collected at beamline 8-2 at the

Advanced Light Source (0.98Å wavelength). Diffraction data were processed using HKL2000.<sup>5</sup> Data processing statistics can be found in Supplementary Table 2.

### *Structure Determination and Refinement*

The IL-4 RGA binary crystal structure (pdb code 3QB7) was solved by molecular replacement with the program PHASER<sup>6</sup> using the coordinates of IL-4 and  $\gamma$ c separately (pdb code 3BPL). After the all domains were placed, the WT sequence was converted to IL-4 RGA and iterative rounds of refinement with PHENIX<sup>7</sup> and model adjustment with COOT<sup>8</sup> were used to refine the structures. Ramachandran analysis was done using MolProbity (<http://molprobity.biochem.duke.edu>). The Ramachandran statistics are 98.0/0.17/1.83 (%), corresponding to favored/allowed/outliers. Buried surface area values were calculated using the Protein Interfaces, Surfaces, and Assemblies (PISA) server ([http://www.ebi.ac.uk/msd-srv/prot\\_int/pistart.html](http://www.ebi.ac.uk/msd-srv/prot_int/pistart.html)). IL-4 RGA consisted of 2 binary complexes. All structural figures and overlays were prepared using the PyMOL<sup>8</sup>.

### *RT-PCR*

RNA was isolated from starved cells with RNeasy Kit (Qiagen). RNA was reverse-transcribed to cDNA using SuperScript II First-Strand Synthesis System for RT-PCR (Invitrogen). Quantitative PCR reactions were performed using a 7900HT sequence detection system (Applied Biosystems). The primer/probe sets to detect IL-4R $\alpha$ , IL-13R $\alpha$ 1 and  $\gamma$ c (FAM-MGB probe), and TaqMan Ribosomal RNA Control Reagents for detecting the 18S ribosomal RNA (VIC-MGB probe) were from Applied Biosystems. The mRNA levels were normalized to 18S ribosomal RNA.

### *Microarray Analysis of Gene Expression in Monocytes*

CD14<sup>+</sup> monocytes were isolated from 5 healthy donors as described above and stimulated for 6 hours with 50 ng/ml GM-CSF alone or with 20 ng/ml of IL-4, Super-4 or KFR. Cells were washed in PBS and lysed in 1 ml TRIzol reagent (Sigma). Total RNA was isolated using a combined TRIzol / RNeasy Micro (Qiagen) protocol. RNA quality was confirmed with a 2100 Bioanalyzer (Agilent). cDNA was generated and labeled using the Two-color Low Input Quick Amp Labeling kit (Agilent), with single treatment samples (GM-CSF alone) labeled with Cy3 and dual treatment samples labeled with Cy5. For each donor, sample from each Cy5-labeled dual treatment (GM-CSF with either IL-4, Super-4 or KFR) was co-hybridized with the corresponding Cy3-labeled single treatment with GM-CSF onto 8x60K SurePrint G3 Gene expression microarrays (Agilent) and processed as per manufacturer's instructions. Raw data were normalized using Feature Extraction software (Agilent). Gene expression analysis was performed on GeneSpring GX11.5 and Excel. Entities only detected in less than 6 arrays, quality control probes and probes for long intergenic non-coding RNAs were excluded. Entities for which there was a significant change (paired *t*-test) in at least one dual treatment group compared to GM-CSF alone (Cy5 vs Cy3) were retained. Fold-change statistical analysis between two given cytokines were determined by paired *t*-test. Microarray data have been submitted to the Gene Expression Omnibus (GEO) Database at NCBI (GEO series accession number: GSE40200).

### *Matlab Script for Calculation of Number of Assembled IL-4 Receptor Complexes*

A Matlab script was utilized to estimate the number of functional IL-4R complexes. In this calculation, we fixed number of IL-4R $\alpha$ 's to 1500 (line 20, of the script) and varied the ligand concentration from 10 to 1000 pg/ml (lines 45 and 47) and number of  $\gamma$ c's per cell between 500

and 4500 (line 14). Finally we varied the affinity of the ligand/IL-4R $\alpha$  complex for  $\gamma$ c to form functional receptor complexes by using two-dimensional equilibrium binding constants ( $K_{a2}$ ) ranging from 0.01 to 1.0  $\mu\text{m}^2$  (line 33). Note that these  $K_{a2}$  constants for the reactions within the membrane may actually be concentration dependent and strongly diffusion limited.

Matlab Script:

```
% after a change enter Ctrl-S to save and run script again.
% Kd for IL4 binding to its receptor; don't change
kdIL4 = 1e-10;
% Kd for IL13 binding to its receptor; don't change
kdIL13 = 3e-8;
% number of IL13Ra receptors
% ***** MAY BE CHANGED *****
numrecsIL13 = 0;
% *****
% 2D concentration of IL13Ra receptors - cell has 275 square microns surface
c_recsIL13 = numrecsIL13/275;
% number of cg (and/or IL13Ra) receptors
% ***** MAY BE CHANGED *****
numrecsCG_or_IL13Ra = 500;
% *****
% 2D concentration of gc (and/or IL13Ra) receptors
c_recsCG_or_IL13Ra = numrecsCG_or_IL13Ra/275;
% number of IL4 receptors
% ***** MAY BE CHANGED *****
numrecsIL4 = 1500;
% *****
% 2D concentration of IL4 receptors
c_recsIL4 = numrecsIL4/275;
% two-dim Ka for binding of IL4Ra to cg or IL13Ra to IL4Ra
% lower limit (weak binder) is 0.01 high limit is 1
% KEEP IN MIND THAT REACTIONS BETWEEN MEMBRANE RECEPTORS ARE
% USUALLY DIFFUSION LIMITED AND WE DON'T KNOW WHETHER THEY ARE
% EQUALLY DISTRIBUTED OR CLUSTERED OR WHETHER THE SIGNAL INDUCES
% CHANGES IN THE DIFFUSIVE BEHAVIOR.
% ***** MAY BE CHANGED *****
kA2d_IL4Ra_cg = 1.0;
kA2d_IL13Ra_IL4Ra = 0.3;
% *****
% two dim kDs:
k2d_IL4Ra_cg = 1.0/kA2d_IL4Ra_cg;
k2d_IL13Ra_IL4Ra = 1.0/kA2d_IL13Ra_IL4Ra;
```

```

% ***** MAY BE CHANGED *****
% start for plot range of concentration of IL13 in ng/ml
nIL13_L = 10;
% end for plot range of concentration of IL13 in ng/ml
nIL13_H = 200000;
% start for plot range of concentration of IL4 in ng/ml
nIL4_L = 0.01;
% end for plot range of concentration of IL4 in ng/ml
nIL4_H = 1000;
% *****
nIL13 = nIL13_L:nIL13_L/5:nIL13_H;
nIL4 = nIL4_L:nIL4_L/5:nIL4_H;
% set the following to 'true' to plot for IL4
IL4 = true;
if(IL4)
Conc2D_recs = c_recsIL4;
Conc2D_recs2 = c_recsCG_or_IL13Ra;
KD_IL = kdIL4;
K2D_rec_rec2 = k2d_IL4Ra_cg;
Fraction_bound = ones(length(nIL4), 1);
Num_bound = ones(length(nIL4), 1);
for n=1:length(nIL4),
Conc_IL = nIL4(n)*7.1e-11;
A = Conc2D_recs2 + Conc2D_recs*Conc_IL/(Conc_IL+KD_IL) + K2D_rec_rec2;
Fraction_bound(n) = (A - sqrt((A*A - 4*Conc2D_recs2*Conc2D_recs*Conc_IL/(Conc_IL
+KD_IL))))/(2*Conc2D_recs);
Num_bound(n) = Fraction_bound(n)*Conc2D_recs*275;
end
plot(nIL4, Num_bound);
ylabel('number of IL4 receptors bound to IL4 and cg/IL13Ra');
xlabel('concentration of IL4 in ng/ml');
else
Conc2D_recs = c_recsIL13;
Conc2D_recs2 = c_recsIL4;
KD_IL = kdIL13;
K2D_rec_rec2 = k2d_IL13Ra_IL4Ra;
Fraction_bound = ones(length(nIL13), 1);
Num_bound = ones(length(nIL13), 1);
for n=1:length(nIL13),
Conc_IL = nIL13(n)*8.8e-11;
A = Conc2D_recs2 + Conc2D_recs*Conc_IL/(Conc_IL+KD_IL) + K2D_rec_rec2;
Fraction_bound(n) = (A - sqrt((A*A - 4*Conc2D_recs2*Conc2D_recs*Conc_IL/(Conc_IL
+KD_IL))))/(2*Conc2D_recs);
Num_bound(n) = Fraction_bound(n)*Conc2D_recs*275;
end
plot(nIL13, Num_bound);

```



```
ylabel('number of IL13 receptors bound to IL13 and IL4Ra');  
xlabel('concentration of IL13 in ng/ml');  
end  
% uncomment the following line to have log scala for concentrations:  
set(gca, 'xscale', 'log');  
grid on;
```

## SUPPLEMENTARY REFERENCES:

1. Boder, E.T. & Wittrup, K.D. Yeast surface display for screening combinatorial polypeptide libraries. *Nat. Biotechnol.* **15**, 553-557 (1997).
2. Chao, G. et al. Isolating and engineering human antibodies using yeast surface display. *Nat. Protoc.* **1**, 755-768 (2006).
3. Levin, A.M. et al. Exploiting a natural conformational switch to engineer an interleukin-2 'superkine'. *Nature* **484**, 529-533 (2012).
4. LaPorte, S.L. et al. Molecular and structural basis of cytokine receptor pleiotropy in the interleukin-4/13 system. *Cell* **132**, 259-272 (2008).
5. Otwinowski, Z. & Minor, W. Processing of X-ray diffraction data collected in oscillation mode. *Methods Enzymol.* **276**, 307-326 (1997).
6. McCoy, A.J. et al. Phaser crystallographic software. *Journal of Applied Crystallography* **40**, 658-674 (2007).
7. Adams, P.D. et al. PHENIX: a comprehensive Python-based system for macromolecular structure solution. *Acta Crystallogr. D. Biol. Crystallogr.* **66**, 213-221 (2010).
8. Emsley, P., Lohkamp, B., Scott, W.G. & Cowtan, K. Features and development of Coot. *Acta Crystallogr. D. Biol. Crystallogr.* **66**, 486-501 (2010).

**SUPPLEMENTARY RESULTS:**

**Supplementary Table 1 - Binding affinities of superkines for  $\gamma$ c and IL-13R $\alpha$ 1.**

|             | Cytokine residue |            |            |            |            |            |            |            | Affinity for $\gamma$ c |                        |                        | Affinity for IL-13R $\alpha$ 1 |                        |                        |
|-------------|------------------|------------|------------|------------|------------|------------|------------|------------|-------------------------|------------------------|------------------------|--------------------------------|------------------------|------------------------|
|             | 117              | 118        | 121        | 122        | 124        | 125        | 128        | 129        | K <sub>d</sub> (nM)     | k <sub>on</sub> (1/ms) | k <sub>off</sub> (1/s) | K <sub>d</sub> (nM)            | k <sub>on</sub> (1/ms) | k <sub>off</sub> (1/s) |
| <b>IL-4</b> | <b>Lys</b>       | <b>Thr</b> | <b>Arg</b> | <b>Glu</b> | <b>Tyr</b> | <b>Ser</b> | <b>Ser</b> | <b>Ser</b> | 3300                    | 9.5x10 <sup>4</sup>    | 0.31                   | 4200                           | 4.1x10 <sup>4</sup>    | 0.17                   |
| RQ          |                  |            | Gln        |            |            |            |            |            | 91                      | 1.9x10 <sup>5</sup>    | 1.7x10 <sup>-2</sup>   | 29000                          | -                      | -                      |
| RGA         | Arg              | Val        | Gln        | Ser        | Trp        | Phe        | Gly        | Ala        | 0.89                    | 6.6x10 <sup>5</sup>    | 5.9x10 <sup>-4</sup>   | 21000                          | -                      | -                      |
| KF          |                  |            | Lys        |            | Phe        |            |            |            | 330                     | 1.1x10 <sup>5</sup>    | 3.6x10 <sup>-2</sup>   | 250                            | 7.3x10 <sup>4</sup>    | 1.8x10 <sup>-2</sup>   |
| KFR         |                  |            | Lys        |            | Phe        | Arg        |            |            | 6400                    | 5.6x10 <sup>4</sup>    | 0.36                   | 9.6                            | 2.5x10 <sup>5</sup>    | 2.4x10 <sup>-3</sup>   |
| IL-13       | <b>Leu</b>       | <b>Leu</b> | <b>Lys</b> | <b>Lys</b> | <b>Phe</b> | <b>Arg</b> | <b>Gln</b> | <b>Phe</b> | U                       |                        |                        | 30                             |                        |                        |

\*U = unmeasurably weak

**Supplementary Table 2 - Data collection and refinement statistics (molecular replacement)**

|                                                     | Super-4/ $\gamma$ c                           |
|-----------------------------------------------------|-----------------------------------------------|
| <b>Data collection</b>                              |                                               |
| Space group                                         | P2 <sub>1</sub> 2 <sub>1</sub> 2 <sub>1</sub> |
| Cell dimensions                                     |                                               |
| <i>a, b, c</i> (Å)                                  | 75.969, 105.879,<br>121.093                   |
| $\alpha, \beta, \gamma$ (°)                         | 90, 90, 90                                    |
| Resolution (Å)                                      | 50.00-3.25(3.37-3.25)                         |
| <i>R</i> <sub>merge</sub>                           | 16.1(99.0)                                    |
| <i>I</i> / $\sigma$ <i>I</i>                        | 13.25(2.07)                                   |
| Completeness (%)                                    | 99.9(99.9)                                    |
| Redundancy                                          | 7.9 (7.9)                                     |
| <b>Refinement</b>                                   |                                               |
| Resolution (Å)                                      | 50.00-3.25                                    |
| No. reflections work/test                           | 15980/799                                     |
| <i>R</i> <sub>work</sub> / <i>R</i> <sub>free</sub> | 23.1/29.2                                     |
| No. atoms                                           | 5341                                          |
| Protein                                             | 5341                                          |
| Ligand/ion                                          |                                               |
| Water                                               |                                               |
| <i>B</i> -factors                                   | 95.1                                          |
| Protein                                             | 95.1                                          |
| Ligand/ion                                          |                                               |
| Water                                               |                                               |
| R.m.s. deviations                                   |                                               |
| Bond lengths (Å)                                    | 0.003                                         |
| Bond angles (°)                                     | 1.324                                         |

**Supplementary Table 3** – Ligand-receptor contact table comparing interactions of  $\gamma\text{c}$  with super-4 versus IL-4. Contacts represent van der Waals interactions unless indicated in bold type, which are within H-bonding distance.

| $\gamma\text{c}$ | IL-4 wt                                              | Super-4                                                         |
|------------------|------------------------------------------------------|-----------------------------------------------------------------|
| 45(VAL)          |                                                      | 125(PHE)                                                        |
| 102(LEU)         | 122(GLU)                                             | 125(PHE)                                                        |
| <b>103(TYR)</b>  | 118(THR)<br>121(ARG)<br>122(GLU)<br>125(SER)         | 115(ARG)<br>118(VAL)<br><b>121(GLN)</b><br>122(SER)<br>125(PHE) |
| <b>125(LYS)</b>  | 114(GLU)<br>118(THR)                                 | <b>114(GLU)</b>                                                 |
| 127(GLN)         | 118(THR)<br>121(ARG)                                 | 121(GLN)                                                        |
| 128(ASN)         | 121(ARG)                                             |                                                                 |
| <b>159(HIS)</b>  | 124(TYR)<br>125(SER)<br>127(CYS)<br>128(SER)         | <b>124(TRP)</b><br><b>125(PHE)</b><br>127(CYS)                  |
| 160(CYS)         | 125(SER)                                             | 125(PHE)                                                        |
| <b>182(TYR)</b>  | 8(GLN)<br>124(TYR)                                   | <b>8(GLN)</b><br>124(TRP)                                       |
| <b>207(PRO)</b>  | 11(ILE)<br>15(ASN)<br>121(ARG)                       | 11(ILE)<br><b>15(ASN)</b><br><b>121(GLN)</b>                    |
| 208(LEU)         | 8(GLN)<br>11(ILE)<br>12(LYS)<br>121(ARG)<br>124(TYR) | 8(GN)<br>11(ILE)<br>121(GLN)<br>124(TRP)                        |
| 209(CYS)         | 121(ARG)<br>124(TYR)<br>125(SER)                     | 121(GLN)<br>124(TRP)<br>125(PHE)                                |
| 210(GLY)         | 121(ARG)                                             | 121(GLN)                                                        |
| <b>211(SER)</b>  | 121(ARG)                                             | 15(ASN)<br><b>117(ARG)</b><br>121(GLN)                          |

**Bold:** potential H-bonds (3.5Å cut off) or salt bridge from  $\gamma\text{c}$  to Super-4  
*Italics:* potential H-bonds (3.5Å cut off) or salt bridge from  $\gamma\text{c}$  to IL-4 wt. **Blue:** amino acid substitution in super-4.

**Supplementary Table 4** – Fold induction (mean, first three columns of data) and p values (paired *t*-test, last three columns of data) of superkine-selective genes

| <b>Gene ID</b>  | <b>IL-4 mean</b> | <b>Super-4 mean</b> | <b>KFR mean</b> | <b>PPT(W-S)</b> | <b>PTT(W-K)</b> | <b>PPT(S-K)</b> |
|-----------------|------------------|---------------------|-----------------|-----------------|-----------------|-----------------|
| <b>GPR183</b>   | 1.361            | 1.544               | 1.225           | 0.069           | 0.009           | 0.003           |
| <b>ASB1</b>     | -0.639           | -0.832              | -0.585          | 0.235           | 0.001           | 0.007           |
| <b>SLA</b>      | 4.143            | 4.329               | 4.023           | 0.236           | 0.030           | 0.040           |
| <b>BIRC2</b>    | -0.312           | -0.258              | -0.351          | 0.280           | 0.024           | 0.010           |
| <b>TMEM216</b>  | -0.302           | -0.423              | -0.257          | 0.307           | 0.006           | 0.003           |
| <b>NMD3</b>     | 0.795            | 0.984               | 0.742           | 0.399           | 0.019           | 0.039           |
| <b>FUNDC2</b>   | 0.162            | 0.232               | 0.126           | 0.473           | 0.012           | 0.037           |
| <b>GLT1D1</b>   | -0.848           | -1.013              | -0.856          | 0.910           | 0.029           | 0.024           |
| <b>ANKRD23</b>  | -0.024           | -0.693              | -0.264          | 0.176           | 0.037           | 0.016           |
| <b>SP110</b>    | -0.386           | -0.821              | -0.520          | 0.282           | 0.036           | 0.047           |
| <b>LIX1L</b>    | -0.103           | -0.395              | -0.171          | 0.669           | 0.049           | 0.018           |
| <b>POMZP3</b>   | -0.078           | 0.223               | -0.067          | 0.939           | 0.011           | 0.014           |
| <b>POLDIP3</b>  | 0.051            | 0.227               | 0.143           | 0.138           | 0.032           | 0.003           |
| <b>CNST</b>     | -0.359           | -0.932              | -0.670          | 0.233           | 0.005           | 0.042           |
| <b>FBLN5</b>    | 1.714            | 2.249               | 1.846           | 0.503           | 0.017           | 0.017           |
| <b>UTRN</b>     | 1.096            | 1.223               | 0.955           | 0.279           | 0.035           | 0.039           |
| <b>GPR68</b>    | -2.802           | -2.817              | -2.479          | 0.001           | 0.000           | 0.597           |
| <b>EMP1</b>     | -2.299           | -2.310              | -1.986          | 0.001           | 0.001           | 0.790           |
| <b>C13orf31</b> | -1.467           | -1.414              | -1.166          | 0.001           | 0.004           | 0.442           |
| <b>ALDH2</b>    | 0.944            | 0.948               | 0.728           | 0.002           | 0.031           | 0.963           |
| <b>BRD7</b>     | -0.480           | -0.438              | -0.339          | 0.003           | 0.035           | 0.068           |
| <b>CUTC</b>     | 0.631            | 0.714               | 0.564           | 0.003           | 0.040           | 0.201           |
| <b>TOR3A</b>    | 1.440            | 1.484               | 1.218           | 0.004           | 0.022           | 0.408           |
| <b>APBB1IP</b>  | 1.782            | 1.845               | 1.609           | 0.004           | 0.008           | 0.331           |
| <b>CCL2</b>     | -4.117           | -4.266              | -3.431          | 0.005           | 0.007           | 0.419           |
| <b>KANK1</b>    | -2.617           | -2.467              | -2.059          | 0.006           | 0.043           | 0.376           |
| <b>DPYSL2</b>   | 1.093            | 1.111               | 0.936           | 0.006           | 0.018           | 0.643           |
| <b>APOL6</b>    | 1.646            | 1.808               | 1.386           | 0.006           | 0.006           | 0.085           |
| <b>BCL6</b>     | -1.346           | -1.322              | -1.179          | 0.006           | 0.012           | 0.445           |
| <b>RPL18A</b>   | 0.600            | 0.535               | 0.387           | 0.009           | 0.023           | 0.285           |
| <b>NDUFV1</b>   | 0.706            | 0.701               | 0.534           | 0.010           | 0.002           | 0.868           |
| <b>HLA-DPA1</b> | 0.518            | 0.419               | 0.293           | 0.010           | 0.049           | 0.133           |
| <b>HEBP1</b>    | -1.656           | -1.581              | -1.383          | 0.011           | 0.030           | 0.485           |
| <b>FRY</b>      | -1.784           | -1.592              | -1.416          | 0.011           | 0.020           | 0.115           |
| <b>C13orf18</b> | -1.647           | -1.580              | -1.243          | 0.013           | 0.038           | 0.571           |
| <b>CAT</b>      | 1.444            | 1.387               | 1.212           | 0.014           | 0.001           | 0.313           |
| <b>BAI1</b>     | -1.312           | -1.242              | -1.024          | 0.014           | 0.018           | 0.272           |
| <b>MED30</b>    | -1.048           | -0.919              | -0.727          | 0.014           | 0.036           | 0.244           |
| <b>TLR1</b>     | -1.409           | -1.392              | -1.170          | 0.015           | 0.013           | 0.681           |
| <b>TRIB3</b>    | -2.562           | -2.576              | -2.318          | 0.016           | 0.001           | 0.857           |
| <b>PTGS2</b>    | -4.304           | -4.276              | -3.757          | 0.017           | 0.030           | 0.843           |

| Gene ID      | IL-4 mean | Super-4 mean | KFR mean | PPT(W-S) | PTT(W-K) | PPT(S-K) |
|--------------|-----------|--------------|----------|----------|----------|----------|
| RGS1         | -3.528    | -3.737       | -3.027   | 0.017    | 0.011    | 0.414    |
| MR1          | 0.501     | 0.544        | 0.397    | 0.018    | 0.001    | 0.368    |
| HOMER3       | -1.025    | -1.016       | -0.877   | 0.019    | 0.032    | 0.772    |
| TCHH         | -2.325    | -2.623       | -1.958   | 0.019    | 0.034    | 0.328    |
| PEX13        | -0.876    | -0.766       | -0.635   | 0.019    | 0.013    | 0.186    |
| PLSCR1       | -1.664    | -1.499       | -1.253   | 0.019    | 0.022    | 0.153    |
| FAU          | 0.315     | 0.273        | 0.197    | 0.019    | 0.041    | 0.321    |
| AK3L1        | -1.313    | -1.439       | -1.089   | 0.020    | 0.037    | 0.460    |
| NUMB         | -1.239    | -1.225       | -1.041   | 0.020    | 0.013    | 0.823    |
| CXCL1        | -3.749    | -3.567       | -2.932   | 0.021    | 0.019    | 0.594    |
| SAV1         | -1.783    | -1.872       | -1.584   | 0.023    | 0.047    | 0.539    |
| TrEMBL       | -0.715    | -0.632       | -0.445   | 0.025    | 0.039    | 0.245    |
| ZAK          | -0.791    | -0.898       | -0.628   | 0.027    | 0.037    | 0.347    |
| TCEB2        | 0.430     | 0.427        | 0.328    | 0.028    | 0.038    | 0.930    |
| CXCL3        | -3.772    | -3.851       | -3.136   | 0.028    | 0.009    | 0.688    |
| MTF1         | -1.430    | -1.282       | -1.073   | 0.029    | 0.048    | 0.133    |
| MECP2        | -0.804    | -0.700       | -0.574   | 0.032    | 0.012    | 0.099    |
| GMFG         | -0.722    | -0.676       | -0.607   | 0.033    | 0.039    | 0.459    |
| LRRC25       | -1.256    | -1.309       | -0.992   | 0.034    | 0.031    | 0.731    |
| MLH1         | -0.950    | -0.888       | -0.737   | 0.035    | 0.032    | 0.364    |
| PSMA1        | -0.315    | -0.265       | -0.212   | 0.035    | 0.037    | 0.242    |
| PAM          | -0.947    | -1.033       | -0.677   | 0.035    | 0.004    | 0.312    |
| LOC283050    | -1.567    | -1.523       | -1.351   | 0.036    | 0.009    | 0.644    |
| LOC100292409 | -0.740    | -0.703       | -0.306   | 0.039    | 0.026    | 0.855    |
| C2CD2        | 1.050     | 1.058        | 0.750    | 0.039    | 0.006    | 0.899    |
| TAP1         | 0.516     | 0.483        | 0.389    | 0.041    | 0.030    | 0.515    |
| ADAM10       | -1.495    | -1.481       | -1.229   | 0.041    | 0.035    | 0.928    |
| SNCA         | -1.466    | -1.362       | -1.148   | 0.041    | 0.014    | 0.513    |
| CKAP4        | -2.725    | -2.800       | -2.324   | 0.042    | 0.003    | 0.597    |
| DOK3         | -1.694    | -1.692       | -1.462   | 0.042    | 0.006    | 0.984    |
| CISH         | 1.088     | 1.030        | 0.887    | 0.042    | 0.020    | 0.438    |
| ARMC8        | -1.117    | -1.089       | -0.769   | 0.043    | 0.048    | 0.882    |
| BEST1        | -1.281    | -1.268       | -1.082   | 0.044    | 0.036    | 0.807    |
| CARD6        | -1.550    | -1.474       | -1.204   | 0.045    | 0.001    | 0.505    |
| ZNF366       | 3.182     | 3.166        | 2.895    | 0.046    | 0.035    | 0.885    |
| SORT1        | 1.074     | 1.098        | 0.913    | 0.046    | 0.011    | 0.737    |
| RNF149       | -1.619    | -1.631       | -1.333   | 0.047    | 0.004    | 0.878    |
| KCNE1L       | -1.687    | -1.353       | -1.110   | 0.048    | 0.032    | 0.175    |
| C21orf7      | -3.142    | -2.878       | -2.454   | 0.049    | 0.040    | 0.084    |
| TBL1XR1      | 0.759     | 0.813        | 0.575    | 0.049    | 0.043    | 0.204    |
| AMOTL1       | 0.261     | -0.026       | -0.758   | 0.015    | 0.029    | 0.208    |
| ADCY4        | -0.017    | -0.066       | 0.137    | 0.017    | 0.009    | 0.498    |
| LOC100128348 | 0.166     | 0.295        | 0.522    | 0.033    | 0.002    | 0.307    |
| PRB3         | 0.276     | 0.275        | -0.480   | 0.044    | 0.013    | 0.998    |
| TRIM59       | -0.293    | -0.329       | -0.660   | 0.045    | 0.017    | 0.776    |
| TSR2         | -0.129    | -0.204       | -0.302   | 0.008    | 0.002    | 0.122    |

| <b>Gene ID</b>     | <b>IL-4 mean</b> | <b>Super-4 mean</b> | <b>KFR mean</b> | <b>PPT(W-S)</b> | <b>PTT(W-K)</b> | <b>PPT(S-K)</b> |
|--------------------|------------------|---------------------|-----------------|-----------------|-----------------|-----------------|
| <b>FARS2</b>       | 0.868            | 0.573               | 0.585           | 0.001           | 0.804           | 0.004           |
| <b>MEI1</b>        | -1.908           | -1.762              | -1.715          | 0.003           | 0.392           | 0.050           |
| <b>AK1</b>         | 0.852            | 0.674               | 0.627           | 0.008           | 0.149           | 0.008           |
| <b>ZNF512B</b>     | 1.508            | 1.282               | 1.289           | 0.011           | 0.897           | 0.013           |
| <b>SPSB1</b>       | 1.433            | 1.065               | 1.169           | 0.011           | 0.368           | 0.015           |
| <b>ATP6V0C</b>     | -0.269           | -0.195              | -0.178          | 0.013           | 0.653           | 0.013           |
| <b>ZFYVE16</b>     | -1.122           | -0.958              | -0.904          | 0.015           | 0.455           | 0.013           |
| <b>RP11-94I2.2</b> | -0.732           | -0.541              | -0.522          | 0.015           | 0.851           | 0.033           |
| <b>P4HA1</b>       | -0.527           | -0.374              | -0.372          | 0.008           | 0.971           | 0.043           |
| <b>CAB39</b>       | -1.100           | -0.911              | -0.820          | 0.023           | 0.384           | 0.007           |
| <b>KCTD11</b>      | -0.434           | -0.597              | -0.554          | 0.023           | 0.620           | 0.042           |
| <b>BTN3A2</b>      | 0.751            | 0.578               | 0.571           | 0.025           | 0.868           | 0.047           |
| <b>C1orf56</b>     | -1.137           | -0.974              | -0.910          | 0.027           | 0.261           | 0.009           |
| <b>SPIRE1</b>      | -0.933           | -0.740              | -0.653          | 0.028           | 0.380           | 0.007           |
| <b>PRDM8</b>       | -2.687           | -2.278              | -2.293          | 0.028           | 0.941           | 0.024           |
| <b>ZNF655</b>      | -0.429           | -0.294              | -0.251          | 0.030           | 0.391           | 0.047           |
| <b>TCEB3</b>       | 0.356            | 0.515               | 0.499           | 0.031           | 0.806           | 0.031           |
| <b>SAMM50</b>      | 0.599            | 0.479               | 0.471           | 0.032           | 0.780           | 0.048           |
| <b>COX7A2</b>      | -0.644           | -0.538              | -0.482          | 0.035           | 0.400           | 0.040           |
| <b>ABCF3</b>       | 0.769            | 0.645               | 0.616           | 0.036           | 0.587           | 0.041           |
| <b>ATP5G2</b>      | 0.597            | 0.489               | 0.460           | 0.036           | 0.396           | 0.037           |
| <b>H2A.2</b>       | 0.270            | 0.385               | 0.382           | 0.037           | 0.910           | 0.017           |
| <b>AP1S2</b>       | -2.491           | -1.801              | -1.582          | 0.042           | 0.441           | 0.002           |
| <b>YIPF5</b>       | -0.546           | -0.756              | -0.610          | 0.046           | 0.102           | 0.034           |
| <b>IGBP1</b>       | 0.514            | 0.430               | 0.376           | 0.046           | 0.237           | 0.006           |
| <b>DAZAP1</b>      | -0.546           | -0.335              | -0.249          | 0.049           | 0.356           | 0.032           |
| <b>PSD4</b>        | 0.702            | 0.468               | 0.232           | 0.010           | 0.015           | 0.010           |
| <b>PSPN</b>        | -0.754           | 0.225               | -0.027          | 0.016           | 0.040           | 0.003           |
| <b>STX10</b>       | 0.622            | 0.089               | 0.136           | 0.004           | 0.731           | 0.009           |
| <b>CNP</b>         | 0.206            | 0.048               | 0.064           | 0.008           | 0.739           | 0.029           |
| <b>TAFI63</b>      | -1.184           | -0.209              | 0.032           | 0.009           | 0.217           | 0.012           |
| <b>ASB6</b>        | 0.321            | 0.233               | 0.096           | 0.010           | 0.061           | 0.030           |
| <b>LY6E</b>        | 1.431            | 1.167               | 1.180           | 0.018           | 0.490           | 0.008           |
| <b>LRRC37A3</b>    | 0.345            | 0.066               | 0.048           | 0.024           | 0.829           | 0.007           |
| <b>ADPRH</b>       | -0.309           | -0.194              | -0.059          | 0.027           | 0.187           | 0.019           |
| <b>GPR150</b>      | -0.532           | -0.437              | -0.326          | 0.027           | 0.124           | 0.042           |
| <b>CCPG1</b>       | -0.633           | -0.201              | -0.197          | 0.028           | 0.963           | 0.014           |
| <b>PDLIM5</b>      | -0.345           | -0.099              | -0.181          | 0.032           | 0.352           | 0.029           |
| <b>REPIN1</b>      | 0.864            | 0.662               | 0.603           | 0.039           | 0.407           | 0.042           |
| <b>MKRN1</b>       | -0.164           | -0.103              | 0.019           | 0.040           | 0.145           | 0.011           |
| <b>PRDM13</b>      | -0.555           | 0.042               | 0.004           | 0.041           | 0.694           | 0.017           |
| <b>TBCA</b>        | -0.459           | -0.282              | -0.238          | 0.042           | 0.573           | 0.009           |
| <b>COPS7B</b>      | 1.131            | 0.512               | 0.199           | 0.049           | 0.407           | 0.002           |
| <b>NOTCH2NL</b>    | -0.906           | -0.480              | -0.386          | 0.009           | 0.245           | 0.038           |
| <b>CD44</b>        | -0.580           | -0.417              | -0.377          | 0.018           | 0.436           | 0.006           |
| <b>GSTK1</b>       | 0.545            | 0.407               | 0.207           | 0.044           | 0.129           | 0.002           |
| <b>SLC41A3</b>     | -0.430           | -0.255              | -0.220          | 0.007           | 0.540           | 0.003           |



**SUPPLEMENTARY FIGURES:**

**a IL-4-Yeast FACS staining with receptor ECD's:**

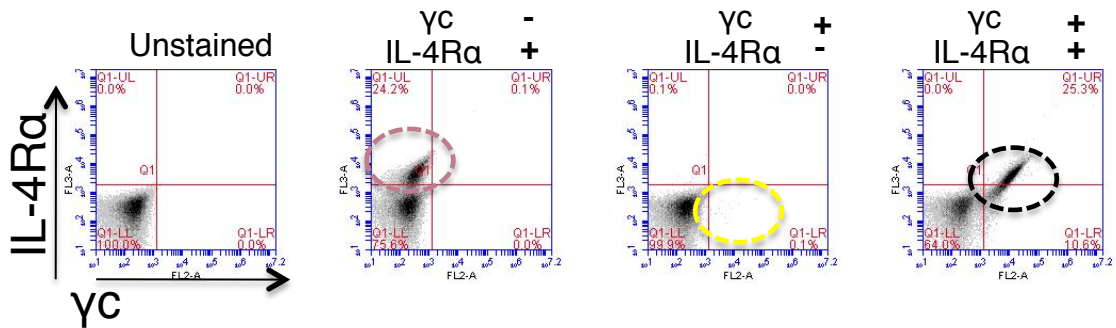

**b Sequential enrichments of IL-4 site 2 library on  $\gamma$ c :**

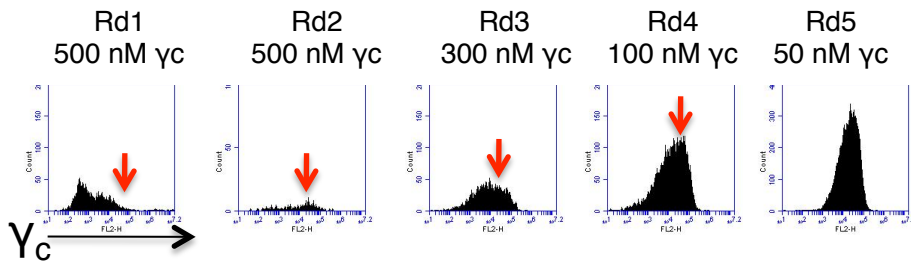

**Supplementary Figure 1** – (a) Cooperative assembly of the IL-4/IL-4Ra/ $\gamma$ c ternary ectodomain complex on yeast displaying IL-4. (b) Step-wise enrichment of the IL-4 site 2 library shown in Figure 1 by selection on  $\gamma$ c tetramers. The library was complexed with IL-4Ra in the first step of selection, subsequent rounds did not include IL-4Ra. A final sixth round of selection was on  $\gamma$ c monomer at  $1\mu\text{m}$  (not shown).

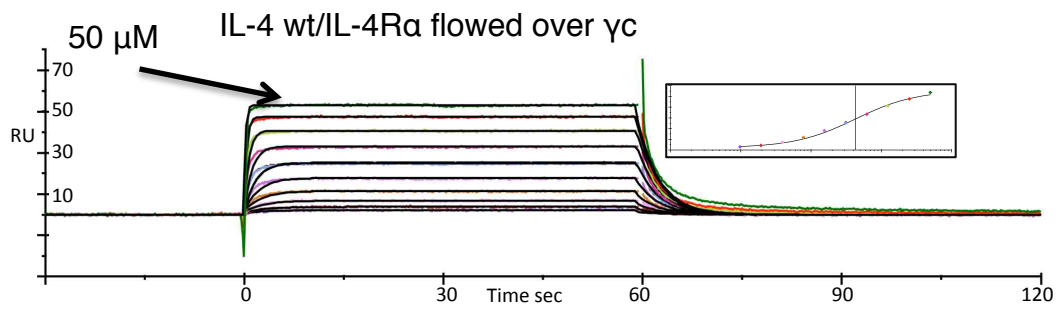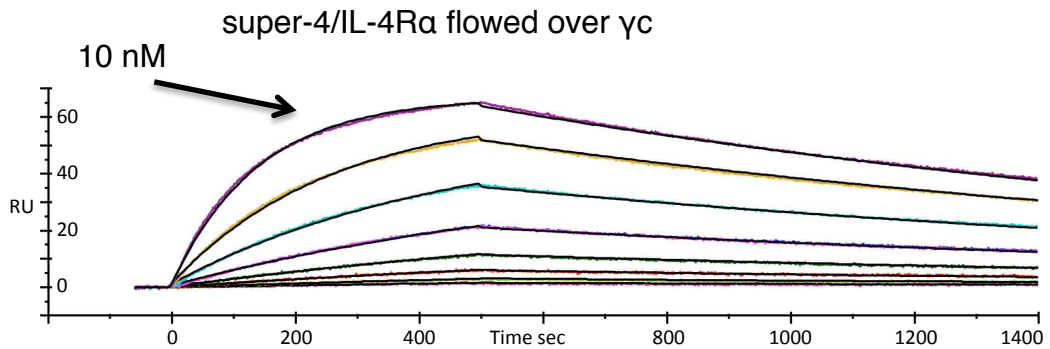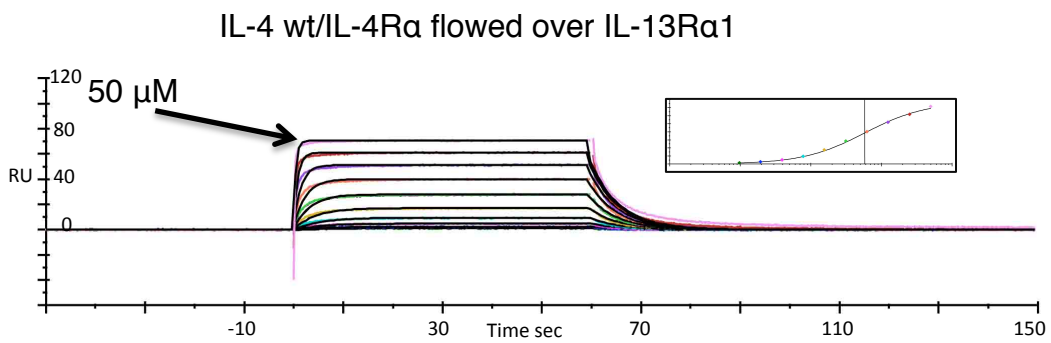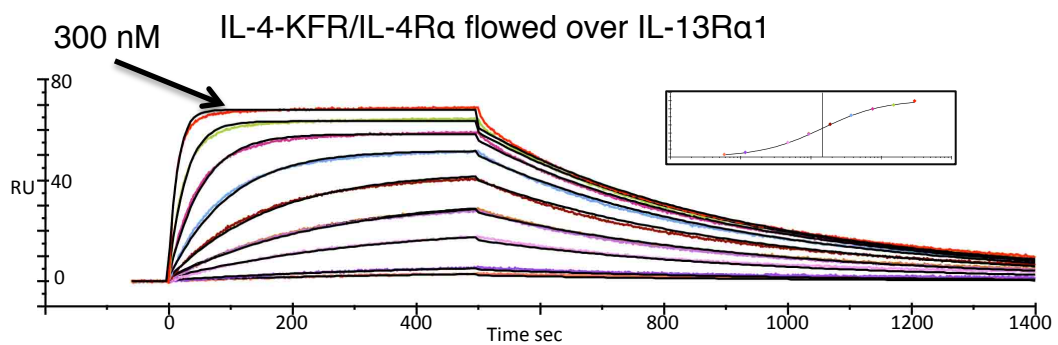

**Supplementary Figure 2** – Surface plasmon resonance analysis of IL-4 and superkine binding to  $\gamma$ C immobilized on surface through C-terminal biotinylation. Inset shows curve fits, data is shown in Supplementary Table 1.

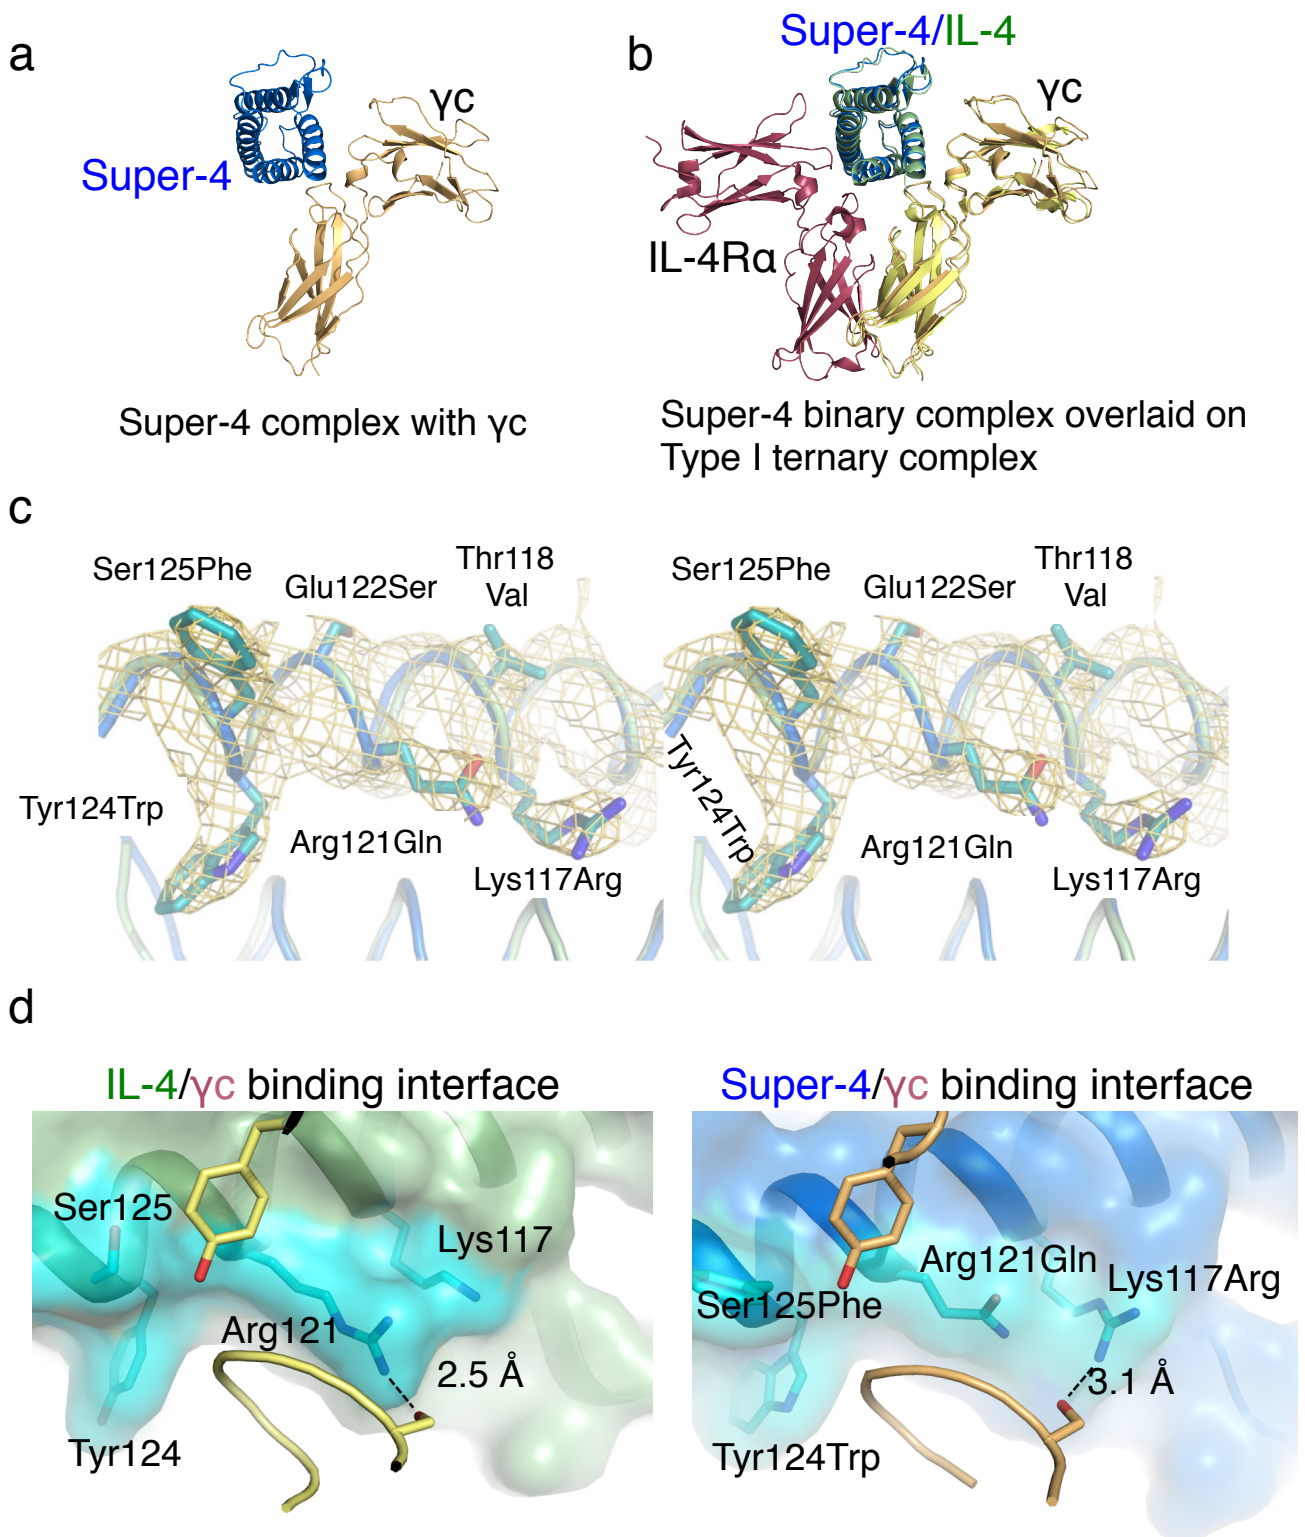

**Supplementary Figure 3** – (a) Crystal structure of the super-4/γc binary complex at 3.25Å. (b) Structural superposition of the super-4/γc binary complex with the IL-4/IL-4Rα/γc ternary complex based on alignment of the cytokines (C-a residues 3-103, 106-127 align with an RMSD of 0.5Å). The docking mode of super-4 with γc is essentially identical to that of IL-4. (c) SigmaA-weighted 2Fo-Fc electron density of super-4 Helix D shown in stereo view. IL-4 wild type helix backbone overlaid in light green. (d) Remodeled hydrogen bonding interactions in the super-4/γc interface. Hydrogen bond lost in Arg121Gln, and new h-bond formed by Lys117Arg.

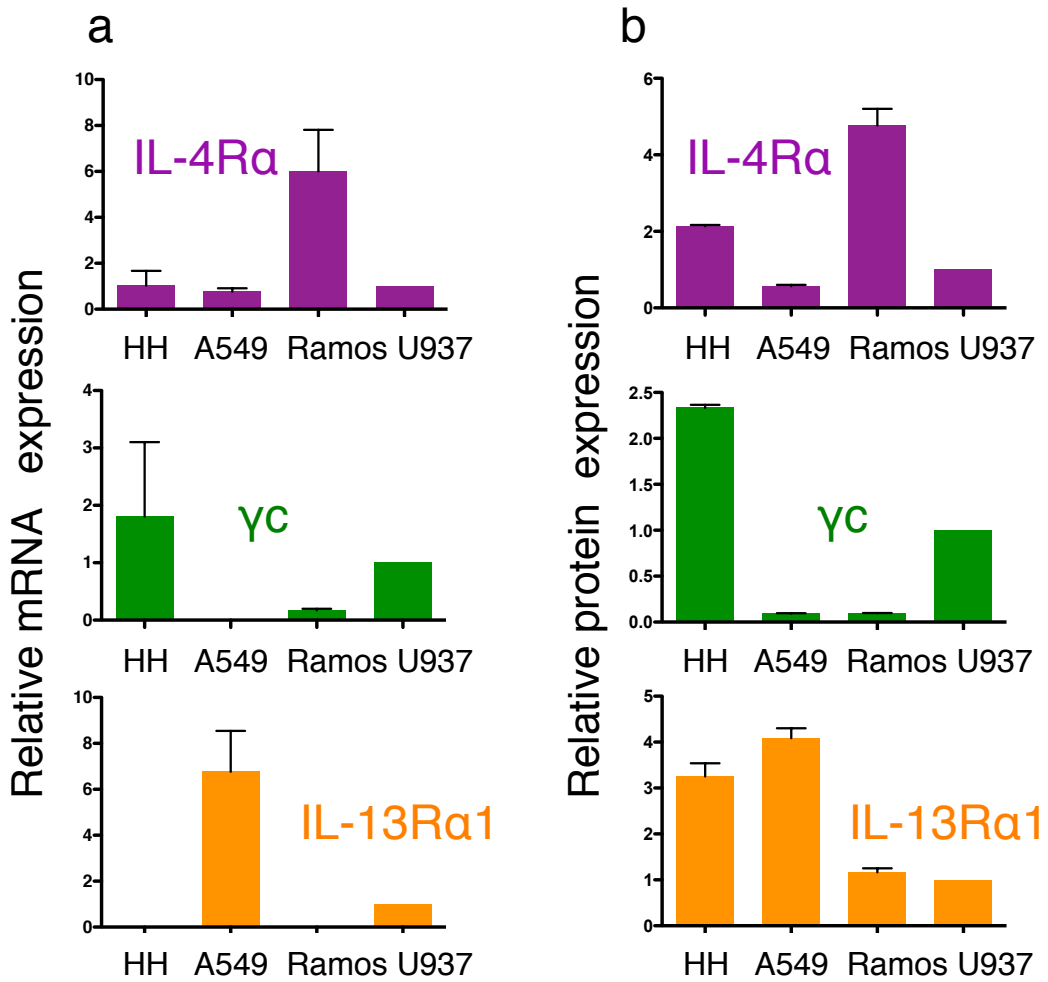

**Supplementary Figure 4** – (a) IL-4 receptor chains mRNA levels and (b) IL-4 receptor chains protein levels on different IL-4 responsive cells

Ligand conc  
(pg/ml)

30

100

300

1000

IL-4

RQ

Super-4

KF

KFR

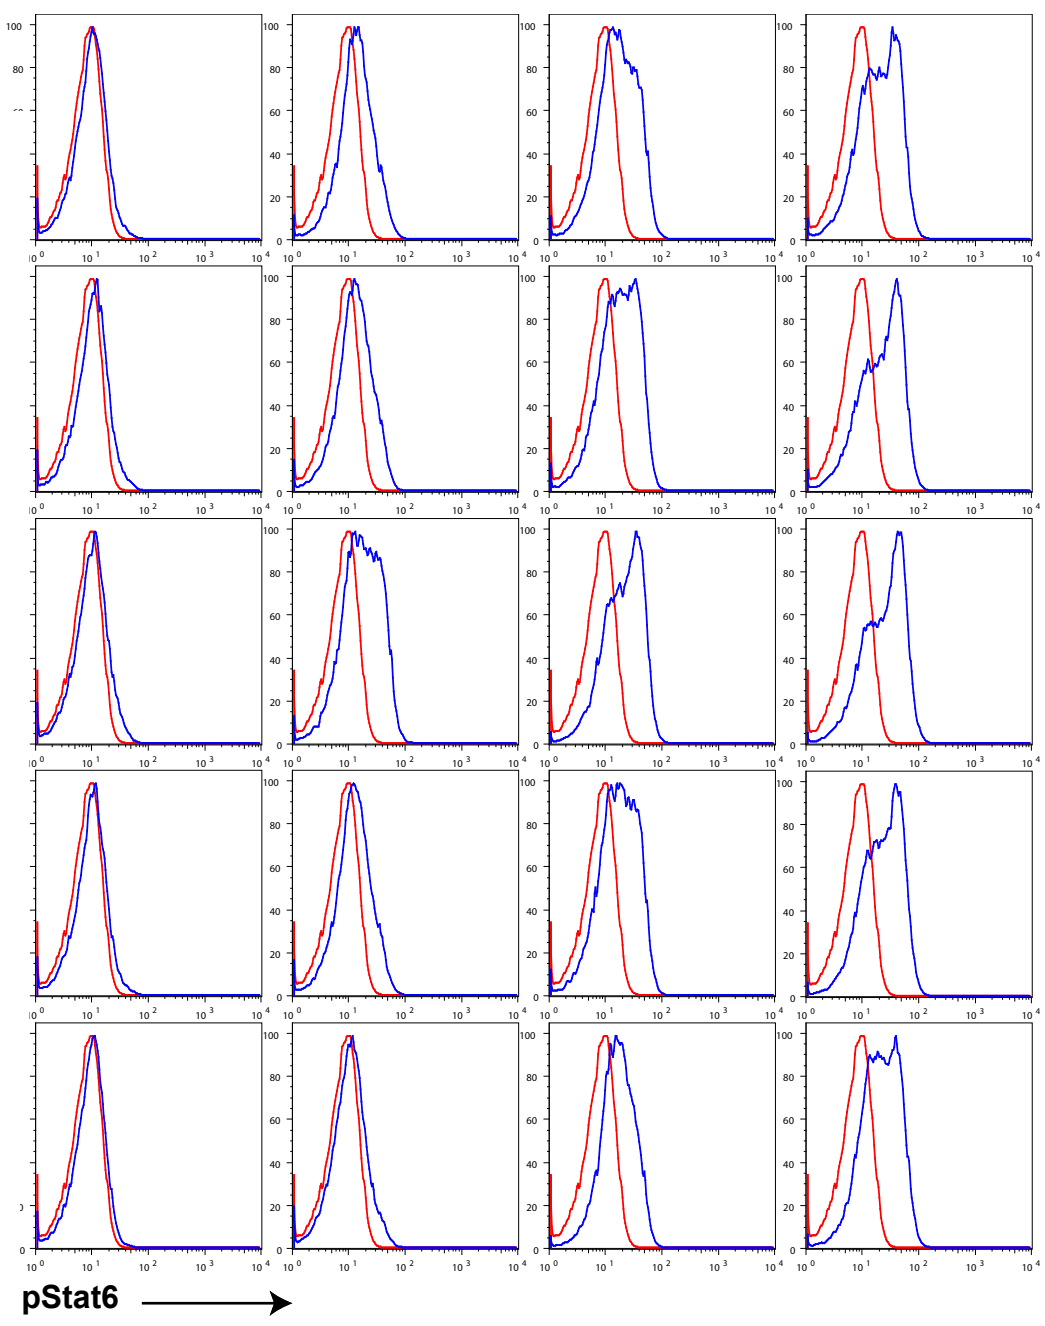

**Supplementary Figure 5** – Representative experiment on superkine-induced STAT6 Tyr641 Phosphorylation in Ramos cells, for details see main Figure 2.

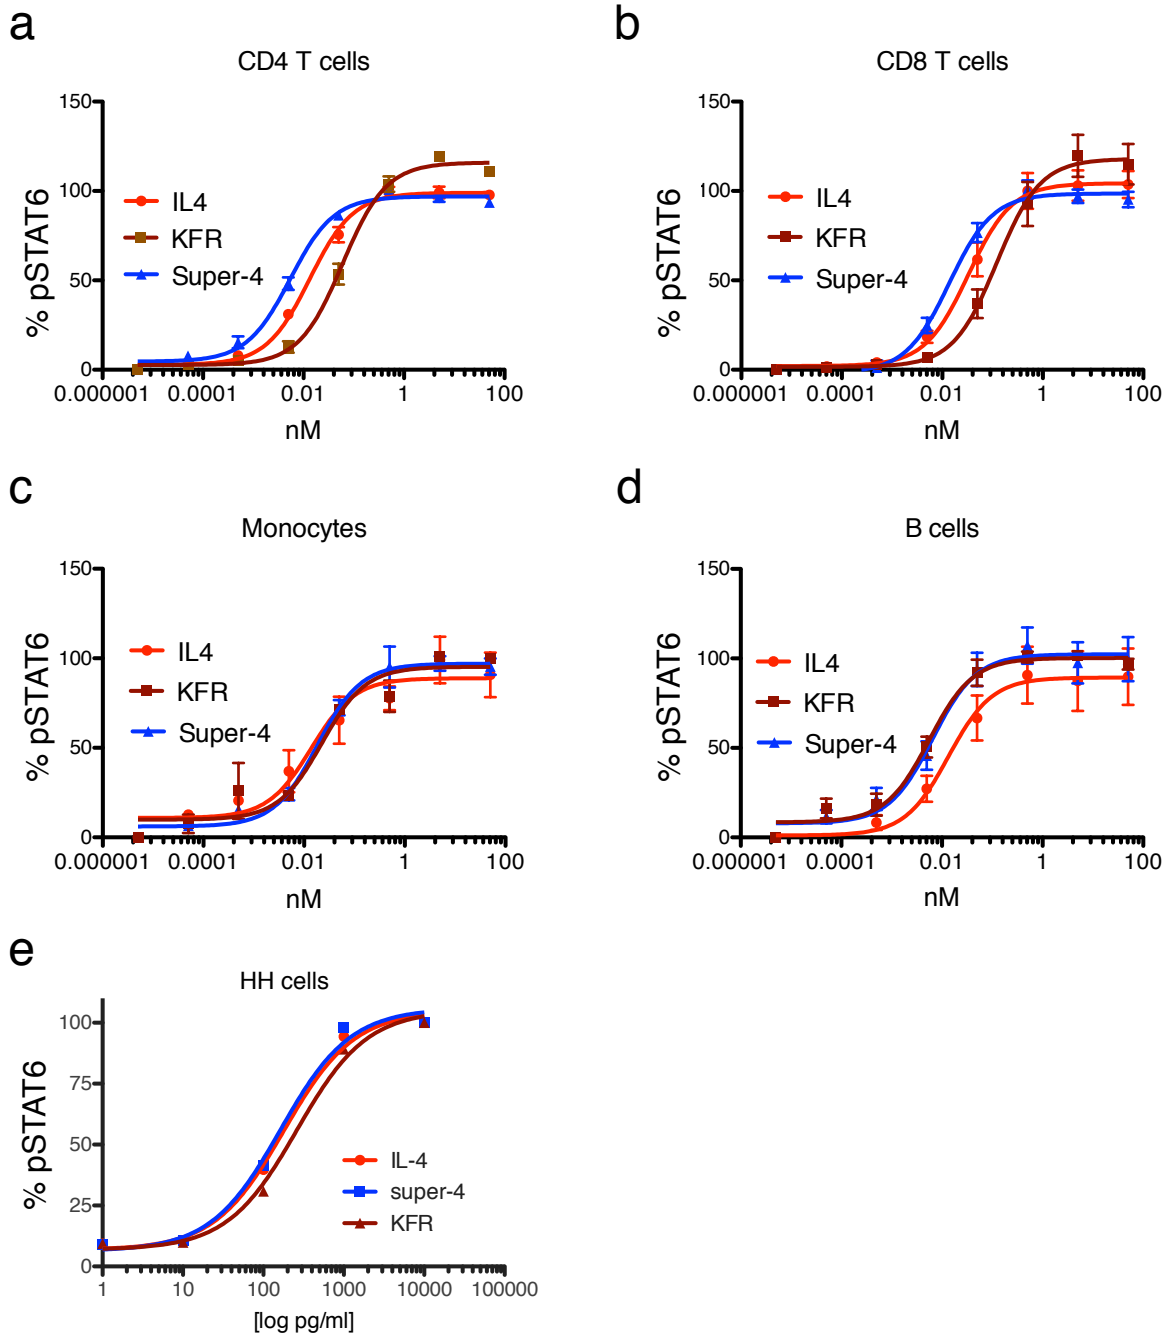

**Supplementary Figure 6** -- STAT6 phosphorylation induced by IL-4 and the two superkines. Cells were stimulated with the indicated doses of IL-4 and the two superkines and the levels of STAT6 phosphorylation were detected in (a) CD4 T cells, (b) CD8 T cells, (c) Monocytes, (d) B cells and (e) HH cells using phospho-STAT6 specific antibodies fluorescently labeled and flow cytometry. Mean and SEM were obtained from three different experiments.

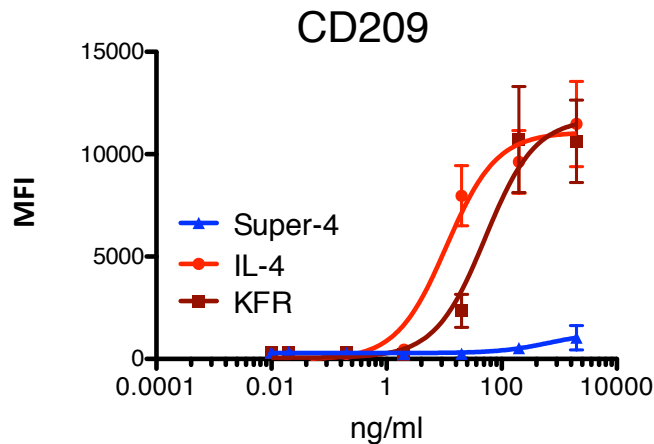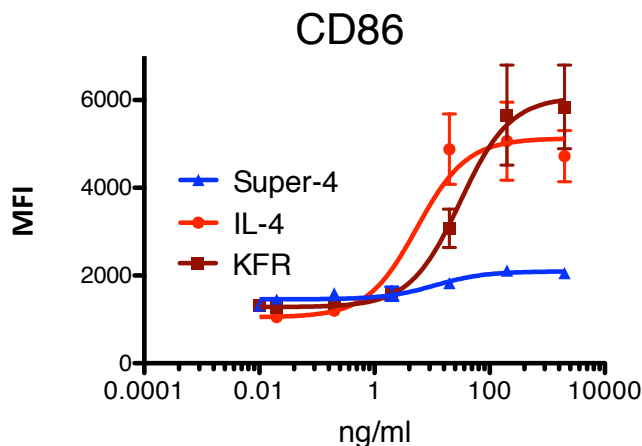

**Supplementary Figure 7** – Dendritic cells differentiation potency exhibited by the IL-4 superkines. CD14<sup>+</sup> monocytes were isolated (>97% purity) and subsequently cultured with 50 ng/mL GM-CSF alone or with the indicated concentrations of IL-4, KFR or super-4. Cells were processed on day 6-7 and stained with Fluorescently labeled antibodies against CD86, CD209. Dendritic cell differentiation was assessed by flow cytometry with a BD LSR II flow cytometer and the mean fluorescent intensity (MFI) was determined on the FlowJo software (Treestar). Data represent mean  $\pm$  SEM from 3 healthy donors.

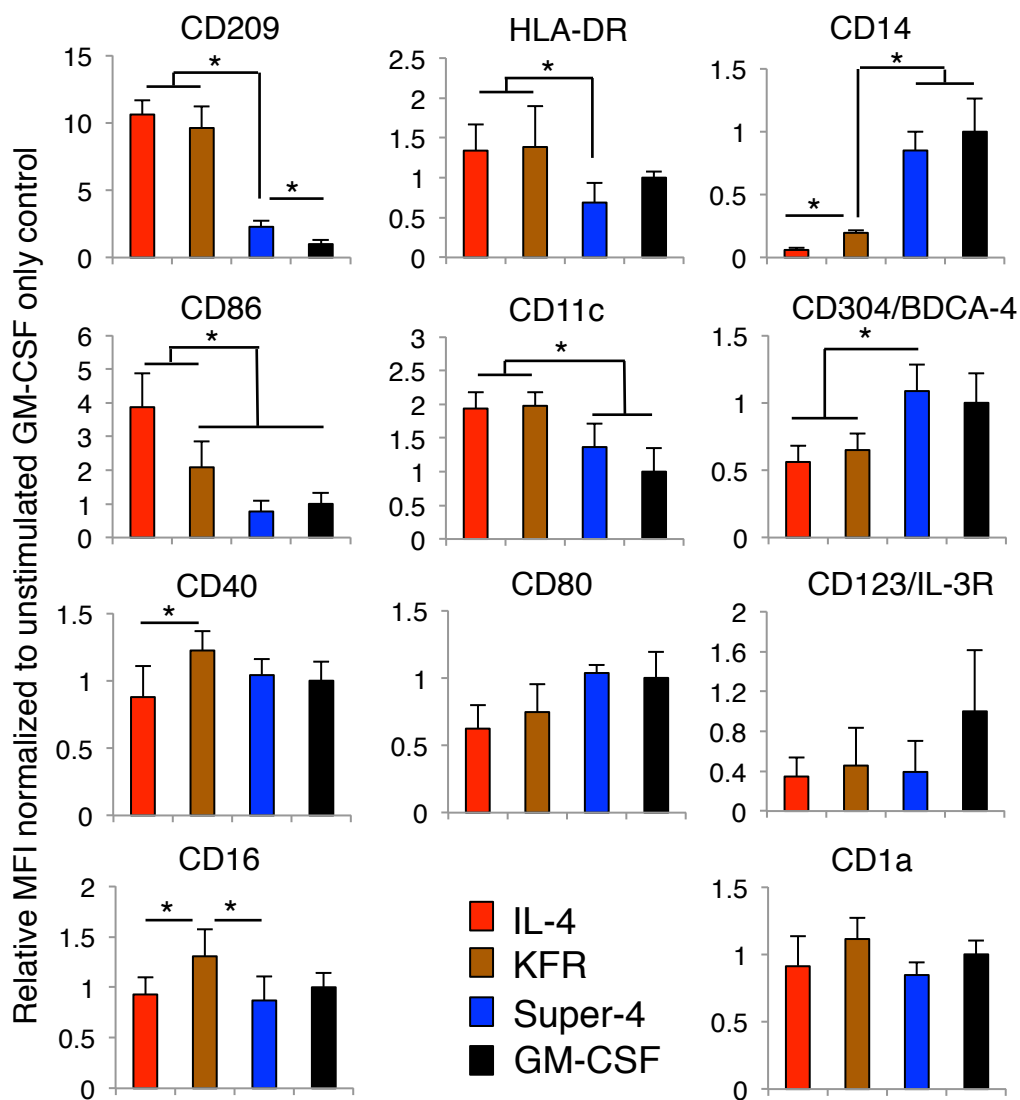

**Supplementary Figure 8** – Differential expression of surface markers in the presence of IL-4, KFR or super-4. Monocytes were cultured for 7 days with 50 ng/ml GM-CSF, with or without IL-4, KFR or super-4 (20 ng/ml). Data represent mean  $\pm$  SD from 3 healthy donors (normalized to GM-CSF alone group). \* $p < 0.05$  (paired T-test). CD1c (BDCA-1) and CD141 (BDCA-3) were not detected above background levels.



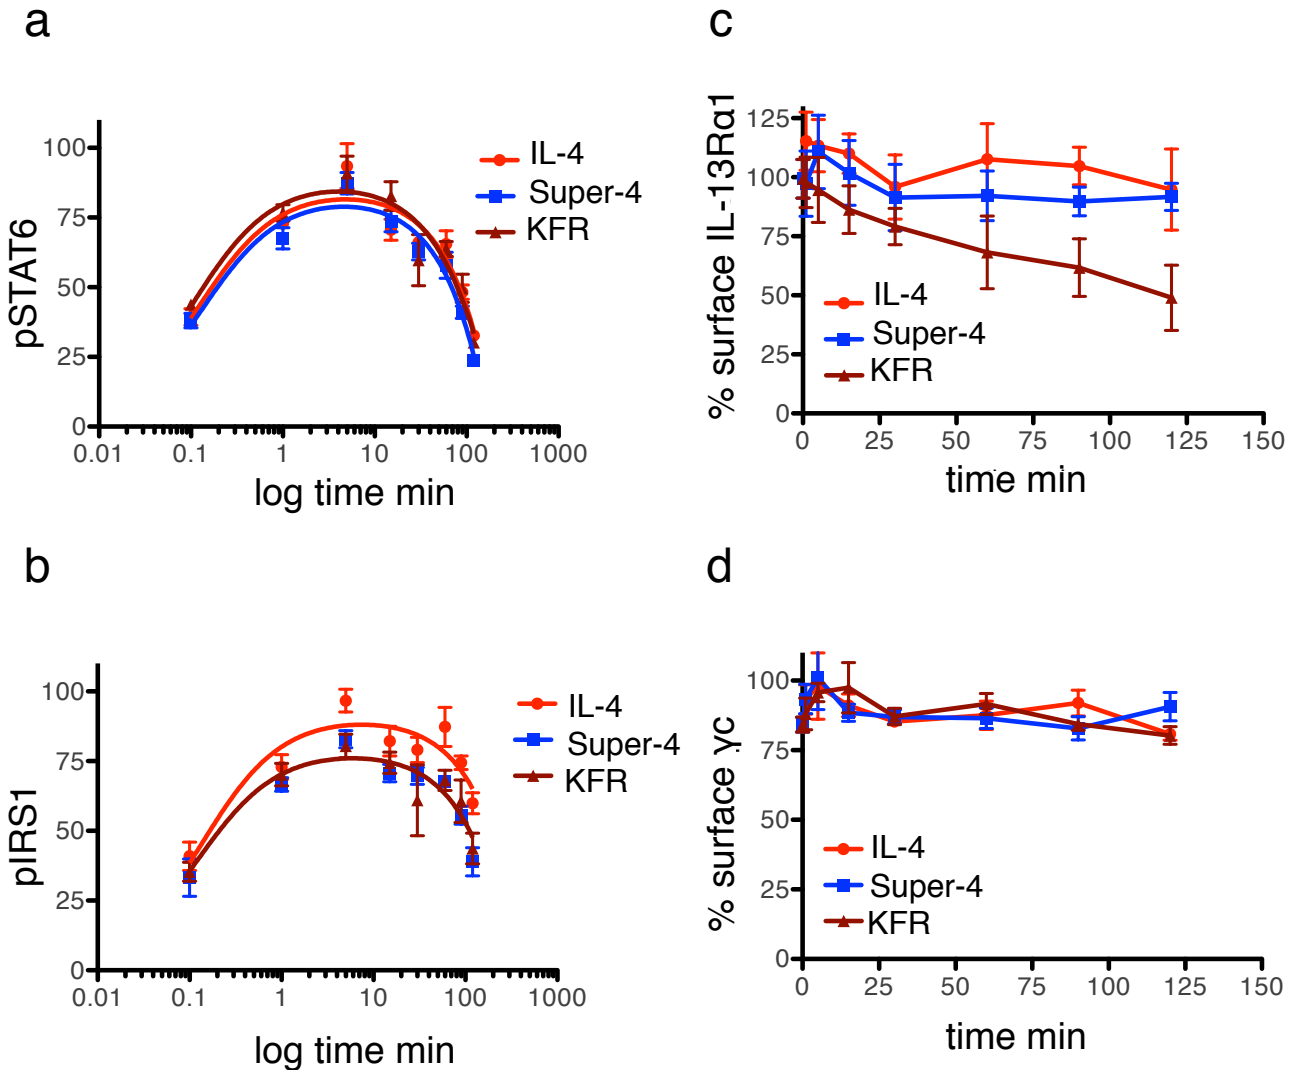

**Supplementary Figure 9** – Receptor downregulation and STAT6 and IRS1 phosphorylation kinetics induced by IL-4 and the two superkines in monocytes. Monocytes were stimulated with 50 nM of IL-4 or the two superkines for the indicated times and cells were either (a-b) fixed and permeabilized with 100% methanol for 30 min and stained with phospho-STAT6 and phospho-IRS1 antibodies; or (c-d) were stained with anti-IL-13R $\alpha$ 1 or  $\gamma$ c specific antibodies for 30 min at 4°C, to prevent receptor internalization, fixed with 4% PFA and analyzed by flow cytometry. Data (mean and SEM) are from four healthy donors.

a

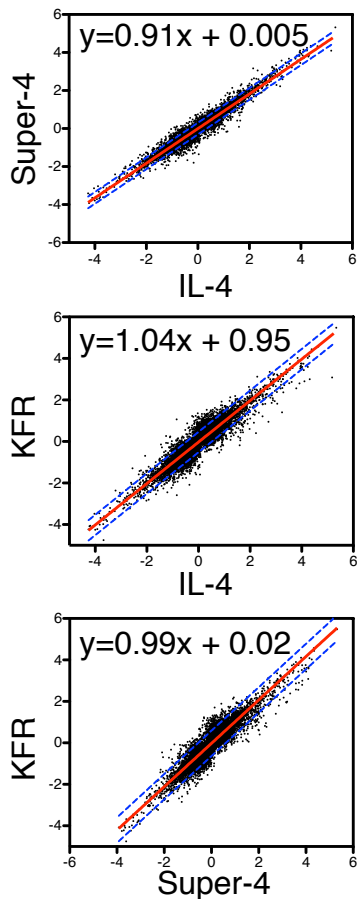

b

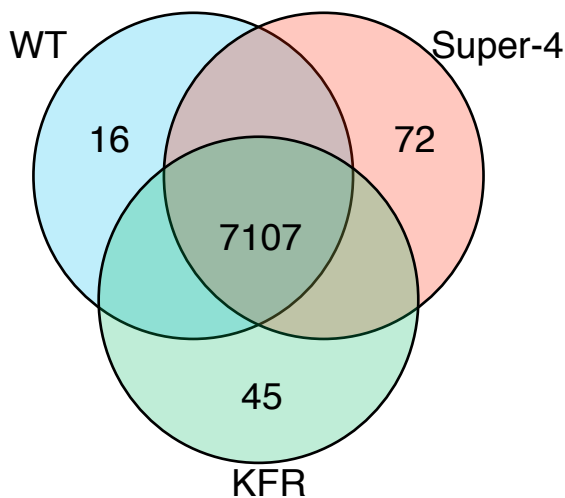

c

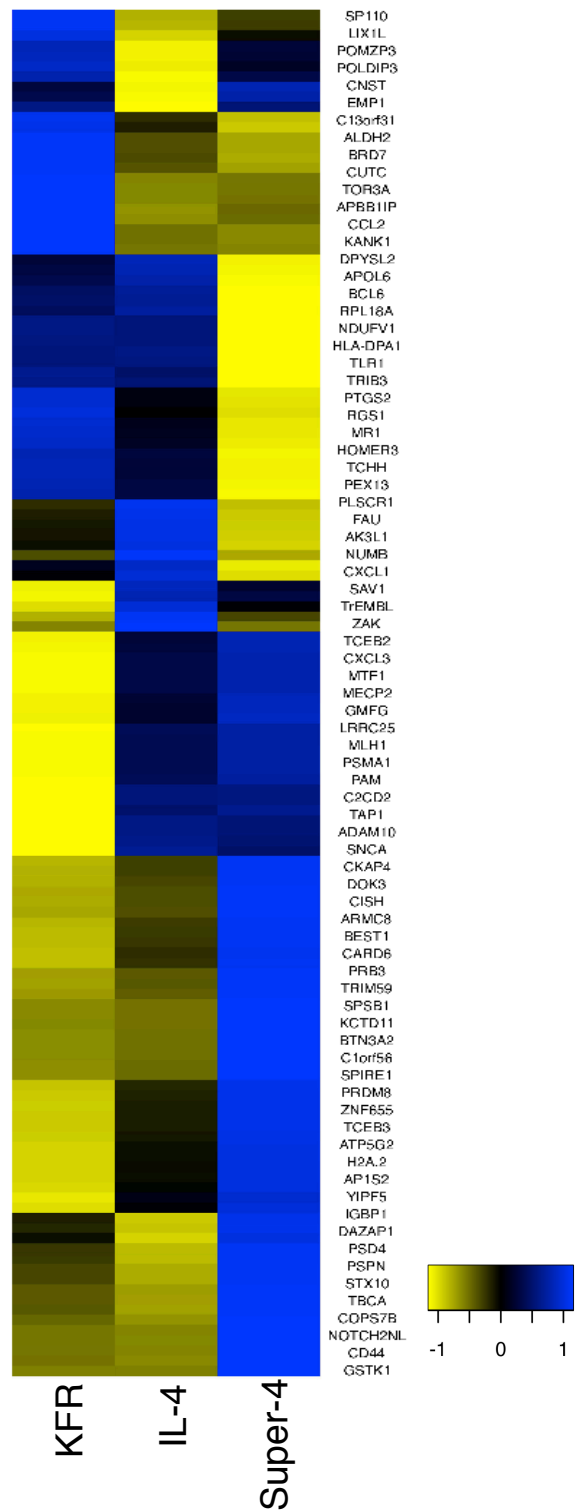

**Supplementary Figure 10** – Gene expression profiles induced by IL-4 and the two superkines in monocytes. Purified monocytes from 5 healthy donors were stimulated for six hours with GM-CSF alone or combined with IL-4 or the two superkines and their RNA was extracted and analyze by two-color Agilent microarrays (60,000 features). (a) Scatter plot correlation comparing the gene induction by the three cytokines are shown. (b) Venn diagram where genes significantly down/up-regulated by the three cytokines, when compared to the GM-CSF control condition, are shown. (c) Heatmap showing a selected list of genes (Supplementary Table 4) significantly regulated by IL-4/super-4 vs KFR, IL-4/KFR vs super-4 or IL-4 vs super-4/KFR ( $p < 0.05$ , paired T-test). Blue color denotes higher expression and yellow color denotes lower expression.

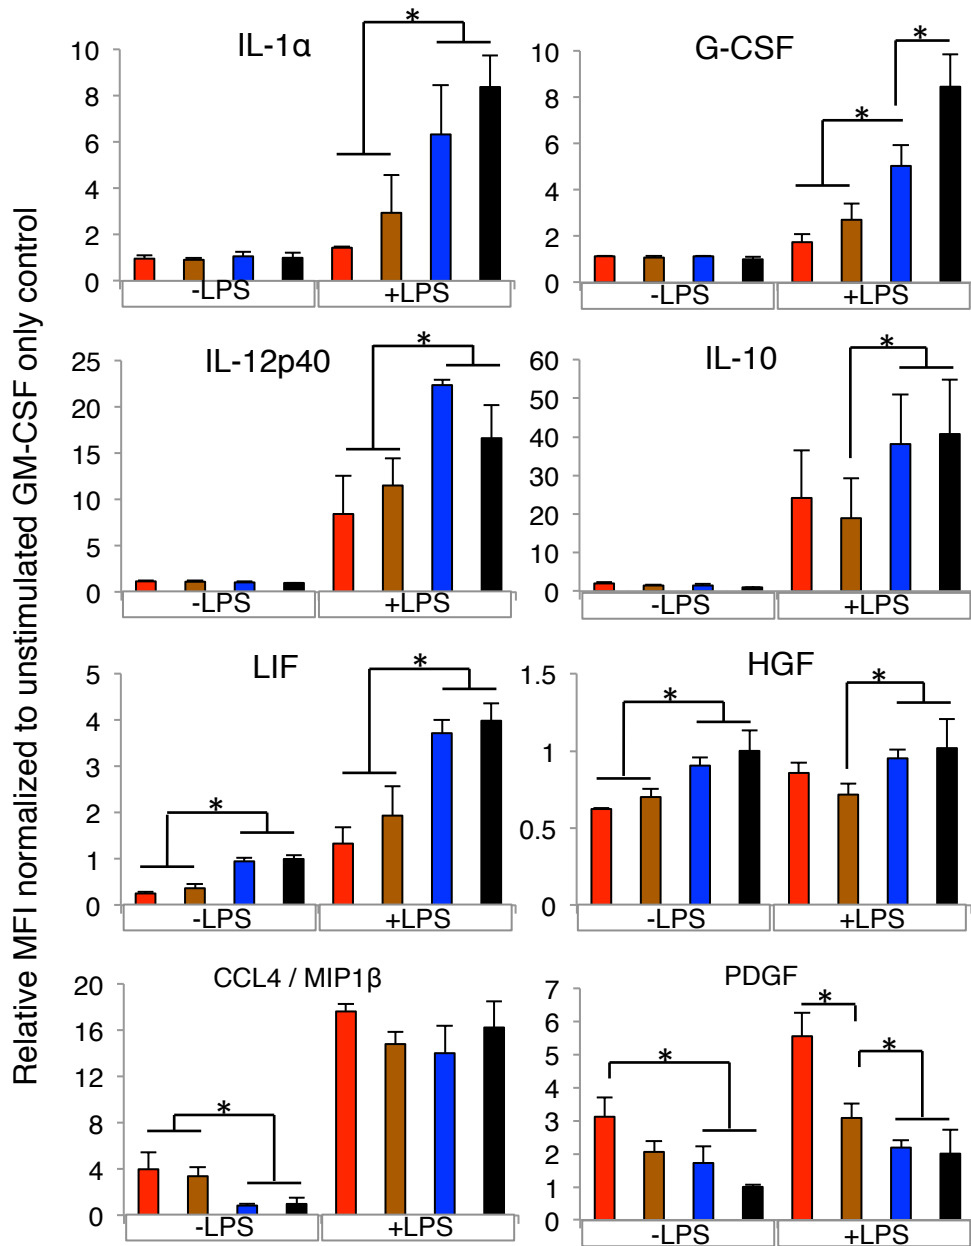

**Supplementary Figure 11** – Differential induction of cytokine secretion by IL-4, KFR and super-4. Monocytes were cultured for 7 days with 50 ng/ml GM-CSF, with or without IL-4, KFR or super-4 (20 ng/ml) then stimulated for 24h with LPS (2 mg/ml), data represent mean  $\pm$  SD from 3 healthy donors (normalized to unstimulated GM-CSF alone group). \* $p < 0.05$  (paired T-test).
